# Supplementary material
Source: publisher figshare collection journal article supplement (https://gsajournals.figshare.com/ndownloader/files/17907269)
Supplement: Supplementary file 1 [file 17907269]

## Sheet: Table S5
Table S5. Genomic fingerprinting of 143 diverse accessions of wheat showing distribution of favorable (1), unfavorable (0) and heterozygote (0.5) alleles of signficant marker-trait associations identified in this study.
										Genotype label from Table S1
Year	Trait	Marker	Chromosome	Position (bp)	Alleles	Favorable allele	SNP effect	P-value	Marker(Trait)	110	111	112	113	114	115	116	117	118	119	10	11	12	13	14	15	16	17	18	19	122	1	123	2	124	3	125	4	5	126	127	6	7	128	8	129	9	20	21	22
2018	Circularity	S1B_53724967	1B	53724967	C/A	C	0.01	9.37148e-07	S1B_53724967(CIR)	0.5	1	1	0.5	0.5	1	1	0.5	1	1	0	1				0.5			0.5	1	1	0	1	1	0	1	1	1	1	1	0.5			0	1	1	0.5	1	1
2018	Circularity	S2B_584120704	2B	584120704	G/T	G	-0.01	3.87441e-08	S2B_584120704(CIR)	0	1	1	1	1	1	1	1	0	1	1	1	0	1	1	0	0	1		1	0	0	0	1	1		1	1		0	1	1	0	1	0	1	0	1	1	1
2018	Circularity	S4B_64816370	4B	64816370	C/T	T	0.01	4.18651e-09	S4B_64816370(CIR)	0	0	0	0	0	1	0	0		0	0	0	0	0	0	0	0	0	0	0	0		0.5	0	0	0	0	0	0	0	0	0	0	0	0	0	0	0	0
2018	Circularity	S5A_6179472	5A	6179472	G/A	G	0.01	9.84688e-08	S5A_6179472(CIR)		1	1	1	1	1	1		1	1	1	1	1			0	0	0			1	1	1			1	0	1	1	0	1	1	0	1	1		0	1	1	1
2018	Emergence	S3B_498344410	3B	498344410	G/A	G	-14.08	7.72206e-07	S3B_498344410(EMER)	1		1	1	1	0			0	1	1	1	1	1	1	1	0	1	1	1	1	0	1	1	1	1	1	1				1	1		1	1	1	1	0	1
2018	Emergence	S6B_190376868	6B	190376868	A/G	A	12.4	3.13273e-08	S6B_190376868(EMER)	0	1	0	1	0	1	1	0	0	0	1	0	0	0	0	0	1	1	0	1	1	0	1	1	1	1	1	1	0	0	1	1	1	1	1	0	1	1	0	0
2017	Gluten content	S2A_750550946	2A	750550946	G/T	T	1.21	3.8585e-09	S2A_750550946(GLUC)	0	0	0	0	0	0	0	0	0	0	0	0	0	0	0	0	0	0	0	0	0	0	0	0	0	0	0	0	0	0	1	0	0	0	0	0	0	0	0	0
2017	Gluten content	S3B_335231956	3B	335231956	A/C	A	-1.13	4.80137e-08	S3B_335231956(GLUC)	1	1	0.5	1	1	0	0.5	1	0.5	1	1	1	1	1	1	1	1	1	1	1	0	0.5	1	1	0.5	0.5	1	1	1	1	1	1	1	0.5	1	1	1	1	1	0.5
2018	Gluten content	S5A_471711779	5A	471711779	G/A	A	-1.44	9.85476e-07	S5A_471711779(GLUC)	0	0	0		0	1		0	0	0	0	0	0	1	0	0	1	0	0	0	0	0	1	0	0	0	0	1	0	0	0	0	0	0	0	0	0	0		0
2018	Gluten content	S5A_471711808	5A	471711808	T/C	C	-1.44	9.85476e-07	S5A_471711808(GLUC)	0	0	0		0	1		0	0	0	0	0	0	1	0	0	1	0	0	0	0	0	1	0	0	0	0	1	0	0	0	0	0	0	0	0	0	0		0
2017	Gluten content	S5B_438017153	5B	438017153	T/C	T	1.19	2.66543e-10	S5B_438017153(GLUC)	0	0.5	0.5	0	0.5	1	0.5	0.5	0.5	0.5	0.5	0.5	0.5	1	0.5	0	1	0.5	0.5	0.5	0	0.5		1	0.5	0.5	0.5	1	0.5	0.5	0.5	0	0	0.5	0.5	0.5	0.5	0	0.5	0.5
2017	Gluten content	S5B_8944420	5B	8944420	G/A	G	-0.78	1.00867e-06	S5B_8944420(GLUC)	1	1	1	1	1	1	1	1	0	1	1	1	1	0	1	1	0	1	1	1	1	1	1	1	1	1	1	0	1	1	1	1	0	0	1	1	1	1	1	0
2017	Gluten content	S7D_394942944	7D	394942944	G/C	C	-1.15	7.66033e-07	S7D_394942944(GLUC)	0	0	0	0		0	0	0	0	0	0	0	0	0	0	0	0	0		0		0	0	0	0	0	0		0	1	0	0	0	0	0	0	0	0	0	0
2018	Grain area	S1D_32503946	1D	32503946	A/T	T	0.77	1.00826e-08	S1D_32503946(GRA)	0	0		0	0	0	0	0	0	0	0	0	0	0	0	0	1	0	0	0	0	1	0	0	0	0	0	0	0	0	0	0	0		0	0	0	0	0	1
2018	Grain area	S1D_38776282	1D	38776282	C/A	C	0.36	5.40183e-07	S1D_38776282(GRA)	0	0	1	1	1			1	1	0	0	0	0	1	0	0	1		1	1	1			0	1	1	1	1	0		1	1			0	1	0	0	1	1
2018	Grain area	S2A_734585818	2A	734585818	T/C	T	1.12	1.86535e-10	S2A_734585818(GRA)	1	1	1	1	1	0	1	1	1	1	1	1	1	1	1	1	1	1	1	1	1	1	0.5	1	1	1	1	1	1	1	1	1	1	1	1	1	1	1	1	1
2017	Grain area	S3A_422328568	3A	422328568	T/G	T	0.71	4.28942e-08	S3A_422328568(GRA)	1	0.5	0.5	0.5	1	0.5	0.5	0.5	0	0.5	1	0.5	0.5	0.5	0.5	0.5	0.5	0.5	0.5	0.5	0.5	1	0.5	0.5	1	0.5	0.5	0.5	0.5	1	0.5	0.5	1	0.5	1	1	0.5	0.5	0.5	0.5
2017	Grain area	S3A_659518524	3A	659518524	G/T	T	0.8	9.1423e-08	S3A_659518524(GRA)	0	0	0			0		0	0	0	0	0	0	0	0	0	0	0		0		0	0	0	0	0	0	1	0	0	0	0	0	0	0	0	0	0	0	0
2018	Grain area	S4A_732725628	4A	732725628	A/C	A	-1.18	1.90829e-14	S4A_732725628(GRA)	1	1	1	1		0	1	1	1	1	1		1	1		1	1	1	1	1	1	1	0	1	1		1		1	1	0	1	1	1	1	1	1		1	1
2017	Grain length	S1D_24724890	1D	24724890	G/A	A	-0.16	8.2525e-10	S1D_24724890(GRL)	0	0	0	0	0	0	0	0	0	0	0	0	0		0	0	1	0	0	0	0	1	0	0	0	0	0	0	0	0	0	0	0	1	0		0	0	0	0
2018	Grain length	S2A_6269139	2A	6269139	G/T	G	-0.1	1.97416e-07	S2A_6269139(GRL)	1	0	1	0	1	0	1	1	0	0	1	0.5	1		0	1		1	1	1			1	0	1	1	1	1	0	1	1		1	1	1	1	0	0	1
2018	Grain length	S2A_734585818	2A	734585818	T/C	T	0.37	4.23109e-15	S2A_734585818(GRL)	1	1	1	1	1	0	1	1	1	1	1	1	1	1	1	1	1	1	1	1	1	1	0.5	1	1	1	1	1	1	1	1	1	1	1	1	1	1	1	1	1
2018	Grain length	S3A_307153492	3A	307153492	G/C	C	-0.23	1.50496e-09	S3A_307153492(GRL)	0		0	0	0	0	0	0	1	0	0	0	0	0	0	0.5	1	0.5	0	0	0	0.5	0		0	0		0	0	0	0	0	0	0	0	0	0	0	0	0
2017	Grain length	S3A_495499647	3A	495499647	A/T	A	-0.14	1.21381e-08	S3A_495499647(GRL)	1	0	0.5	0.5	1	1	0.5	0.5	0.5	0.5	0.5	0.5	1		0.5	1	0.5	0.5	0.5	0.5	0.5	0.5	0.5	0.5	1	0.5	1	1	1	1	0.5	0.5	1	0.5	1		1	0.5	0.5	0.5
2018	Grain length	S4B_14268046	4B	14268046	A/G	G	0.19	3.91779e-08	S4B_14268046(GRL)	0	0	0	0	0	0	0	0	1	0	0	0	0	0	0	0	1	0	0	0	0	1	0	0	0	0	0	0	0	0	0	0	0	0	0	0	0	0	0	0
2017	Grain length	S4B_64816370	4B	64816370	C/T	C	-0.23	4.46355e-08	S4B_64816370(GRL)	1	1	1	1	1	0	1	1		1	1	1	1	1	1	1	1	1	1	1	1		0.5	1	1	1	1	1	1	1	1	1	1	1	1	1	1	1	1
2018	Grain length	S5B_399398211	5B	399398211	A/G	G	0.18	8.53308e-07	S5B_399398211(GRL)	0	0	0	0	0	0	0	0	1	0	0	0	0	0	0	0	1	0	0	0	0	1	0	0	0	0	0	0	0	0	0	0	1	0	0	0	0	0	0	1
2018	Grain length	S6D_470516697	6D	470516697	G/A	A	-0.17	2.20786e-08	S6D_470516697(GRL)	0.5	0.5		0.5	0.5	0.5	0.5	0.5	0	1	0.5	0.5	0.5	0	0.5	0.5	0	0.5		0.5			0.5	0.5	0	0	0.5	0.5		0.5	0.5		1	0.5	0.5		0.5	0.5	0.5
2018	Grain length	S7A_636900050	7A	636900050	A/C	A	0.17	4.17937e-11	S7A_636900050(GRL)	1	1	0	0	1	1	0	1	1	1	0	1	1	0	0	1	1	1	0.5	1	0	0	1	0	1	1	1	0	1	0.5	1	0	0	0	1	0	0	0	0	0
2018	Grain length	S7B_653444351	7B	653444351	C/T	C	-0.1	2.09348e-07	S7B_653444351(GRL)	1	0.5	1	1	1	1	1	1	1	0.5	1	1	0.5	0.5	1	1	1	0.5	1	1	1	1	1	1	1	1	0.5	1	1	1	0.5	1	1	1	1	0.5	1	1	1	1
2017	Grain perimeter	S2A_24003058	2A	24003058	G/A	G	0.33	6.77266e-07	S2A_24003058(GRPRM)	1	1	1	0.5	1	1		1	1	1	1	1	1	1	1	1	0.5	1	1	1	0.5	0.5	1	1	1	1	1	1	1	1	1	0.5	1	1	1	1	1	1	1	1
2018	Grain perimeter	S2A_734585818	2A	734585818	T/C	T	0.55	3.51214e-10	S2A_734585818(GRPRM)	1	1	1	1	1	0	1	1	1	1	1	1	1	1	1	1	1	1	1	1	1	1	0.5	1	1	1	1	1	1	1	1	1	1	1	1	1	1	1	1	1
2017	Grain perimeter	S2B_771414440	2B	771414440	A/G	G	0.25	7.56819e-07	S2B_771414440(GRPRM)	0	0	1		0	0	1	0		0	0	0	0	0	0	0	0	0	0	0	1	1	0	0	1	1	0	0	0	0	0	1	0	1	0	0	0	0	0	0.5
2018	Grain perimeter	S3A_733469510	3A	733469510	G/T	T	0.18	1.12999e-07	S3A_733469510(GRPRM)	0	0	0		0	0		1	1		1	0	0	1	0	0	0		0	0	1	0	0	0	0	1	0	1	0	0		1	0	1	1	0	0	0	1	1
2018	Grain perimeter	S4A_732725628	4A	732725628	A/C	A	-0.46	3.6143e-10	S4A_732725628(GRPRM)	1	1	1	1		0	1	1	1	1	1		1	1		1	1	1	1	1	1	1	0	1	1		1		1	1	0	1	1	1	1	1	1		1	1
2018	Grain perimeter	S5B_399398211	5B	399398211	A/G	G	0.5	4.01216e-10	S5B_399398211(GRPRM)	0	0	0	0	0	0	0	0	1	0	0	0	0	0	0	0	1	0	0	0	0	1	0	0	0	0	0	0	0	0	0	0	1	0	0	0	0	0	0	1
2017	Grain weight plant	S1B_29205666	1B	29205666	G/A	A	-0.29	9.28391e-08	S1B_29205666(GWPL)	0		0	0	0	0	0	0	0	0	0	0	0	0		0	0		0	0	0	0	0		0	0.5		0	0		0	0			0	0	0		0	0.5
2017	Grain weight plant	S2A_57829714	2A	57829714	G/C	C	-0.16	6.11131e-07	S2A_57829714(GWPL)	0	1	0	0	0	0	0	0	0	0	0	0	0	0	1	0	0	0	0	0	0	0	0	0	1	1	0	1	0	0	0	0	0	0	0	0	0	1	0	0
2017	Grain weight plant	S3B_221532349	3B	221532349	G/A	G	0.14	8.26071e-07	S3B_221532349(GWPL)	0.5	1	0.5	0.5	1	0	0.5	1	1	0.5	1	0.5	0.5	0.5	1	0.5	0.5	0.5	0.5	0.5	1	0.5	1	1	1	1	0.5	0.5	1	1	1	1	1	0.5	1	1	0.5	1	0.5	1
2017	Grain weight spike	S1B_453188672	1B	453188672	C/T	T	0.06	1.19319e-07	S1B_453188672(GWSPK)	1	0	0	1	1	0	0	1	0	0	0	1	1	1	1	1	0	1	0	1	0	0	0	1	0	1	0	1	1	1	0	1	1	0	1	1	1	1	0	0
2018	Grain weight spike	S1B_457535596	1B	457535596	C/T	T	0.07	2.60197e-08	S1B_457535596(GWSPK)	0	0	0	1	1	0	0	1	0	1	0	1	1	1	1	0	0	1	0	1	0	0	0	1	0	1	0	1	0	1	0	1	1	0	0	1	1	1	0	0
2017	Grain weight spike	S2A_718230521	2A	718230521	G/A	A	-0.12	8.66726e-08	S2A_718230521(GWSPK)	0	0	0	0	0	1	0	0	0	0	0	0		0	0	0	0	0	0	0	0		0	0	0	1	0	0	0	0	0	0	0	0	0	0	0	0	0	0
2017	Grain weight spike	S4A_656103460	4A	656103460	G/C	C	-0.08	6.8955e-08	S4A_656103460(GWSPK)	0	0		0	0.5	0	0	0.5	0.5	0.5	0	0		0.5	0.5	0	1	0.5	0.5	0	0	0.5	0	0.5	0	0	0	0		0		0	0	0.5	0.5	0	0	0.5	1
2018	Grain weight spike	S7A_675060149	7A	675060149	C/A	A	-0.09	1.43028e-08	S7A_675060149(GWSPK)	0	0	0	0	0	1	0	0	0	0	0	0	0	0	0	0	0	0	0	0	0	0		0	1	1	0	0	0	0	0	0	0	0	0	0	0	0	0	0
2018	Grain weight spike	S7D_385718003	7D	385718003	C/T	T	0.07	6.96762e-08	S7D_385718003(GWSPK)	0	0	0	0	1	0	1	1	0	0	0	0	0	0	1	0	0	0		0	0	0	0	1	0	1	0	0	1		1	0	0	0	0	1	0	1		0
2018	Grain yield	S3A_572390836	3A	572390836	A/G	A	-54.86	3.00221e-07	S3A_572390836(GYL)	1	1	1	1	0.5	1		0.5	1	1	1	1	1	1	1	0.5	1	1	1	1	1	1	0.5	1	1	1	1	0	0	1	1	1	1	1		1	0.5	1	1	1
2017	Grain yield	S3D_12828956	3D	12828956	G/A	G	21.54	5.34759e-07	S3D_12828956(GYL)		1	1	1	0.5	1	0.5	1	1	1	1	0.5	0.5	0	1		0.5	1	1	1		0	1	0	1	1	1	0	1	1	0.5	0		0.5	1	1		1	1
2017	Grain yield	S5B_28753553	5B	28753553	A/G	G	24.43	5.78181e-07	S5B_28753553(GYL)	0	0	0		0	0		0	0	1	0	0	0	0	0	0	0	0	0	0	0	0	0	0	1	1	0	0	1	0	1	0	0	0	0	0	0	0	0	0
2017	Grain yield	S6D_8489693	6D	8489693	C/T	C	-42.88	2.30507e-07	S6D_8489693(GYL)	1	1	1	1	1	0.5	1	1	1	1	1	1	1	0.5	1	1	1	0.5		1	1	1	1	1	1	0.5	1	1	1	1	1	1	0.5	1	1	1	1	1	1	1
2017	Grain yield	S7D_581411783	7D	581411783	G/A	G	32.43	5.36052e-07	S7D_581411783(GYL)	1	1	1	0.5	1	1	1	0.5	1	1	0	0.5	1	1	0.5	1	1	0.5	1	0.5	1	1	0.5	0.5	1	1	0.5	0.5	1	1	0.5	0.5	0.5	1	1	1	1	0.5	1	1
2018	Grains per spike	S4D_457523184	4D	457523184	T/G	G	-1.99	3.95674e-10	S4D_457523184(GPSPK)	0	0	0	1	0	0	0	0	0	0	0	0	0	1	1	0	0	0	0	0	0	0	0	1	0	1	0	1	0	1	0	1	0	0	0	0	0	1	0	1
2018	Grains per spike	S5D_198466085	5D	198466085	G/C	G	2.24	4.42064e-08	S5D_198466085(GPSPK)	1	0.5	0	0.5	1		0.5	0		0	1	0.5	1	1	1	1	0	0	0.5	0.5	1	0.5		1	0	0.5	0.5	1	0.5	1	0.5	1	1	0	1		1	1	0.5	0
2017	Harvest index	S1B_328813768	1B	328813768	G/A	A	-0.03	6.19069e-07	S1B_328813768(HI)	0	1	1	0	0	1	1	0	1	0	1	0	1	0	0	0	1	0	0	0	1	1	0	0	0	0	0	0	0	0	0	0	0	1	0	0	0	0	0	1
2018	Harvest index	S4B_597985902	4B	597985902	A/G	A	-0.01	6.64647e-07	S4B_597985902(HI)	1		1	1	1	1		1	1	1	0	1	1	1	1	1	1	1	1	1	0	1	1	1		1	1	0	1	1	1	1	1		1	1	1	1	1
2018	Harvest index	S5A_457925029	5A	457925029	A/G	A	-0.01	1.35025e-07	S5A_457925029(HI)	0	1	1	1	1	1	1	1	1	1	1	1	1	1	0	0	1	1	1	0		1	1	0	0	1	1	1	1	1	0	1	1	0	1	0	0	1	1	1
2017	Harvest index	S5A_584618691	5A	584618691	C/A	C	0.04	2.31005e-07	S5A_584618691(HI)	0	1	1	0	1	1	0	1	1	1	0	1	1	0	1		1	1	1	1	0	1	1	0	1	1	1	0	1	1	1	0	1	0	1		0	1	1	0
2017	Harvest index	S5A_584712144	5A	584712144	C/T	C	-0.03	8.41916e-07	S5A_584712144(HI)	0	1	1	0	1	1	0	1	1	1	0	1	1	0	1	0	1	1	1	1	0	1	1	0	1	1	1	0	1	1	1	0	1	0	1	1	0	1	1	0
2017	Harvest index	S5A_586600382	5A	586600382	G/T	G	-0.03	7.74715e-07	S5A_586600382(HI)		1	1	0	1	1	0	1	1	1	0	1	1	0	1	0	1	1	1	1		1	1	0	1	1	1	0	1	1	1	0	1	0	1	1	0	1	0.5	0
2018	Harvest index	S5A_698003176	5A	698003176	T/G	T	0.01	1.0459e-06	S5A_698003176(HI)	0	1	1	1	1	1	1	1	1	1	0	1	1	0	0	0	1	0	0	1	1	1	1	0	0	0	0	0	1	0	0	1	0	0	0	0	0	1	1	1
2018	Harvest index	S6A_595332862	6A	595332862	A/G	G	0.01	6.70145e-09	S6A_595332862(HI)	0	0	1	0.5	0	1	1	0	0	0	1	0	0	0	0	0	0	0	1	0	0	0	1	0	1	0	0	0	0	0	0	1	0	1	0	0	0	1	1	0
2018	Harvest index	S7A_30243478	7A	30243478	G/C	G	0.01	8.34575e-07	S7A_30243478(HI)	1	0			0			1	1	1	1	1	1	0	1	1	0		0	0		0	1	1	1	1	1	0		1	1	1		1	1		1	1	1	1
2018	Harvest index	S7B_530381515	7B	530381515	A/G	G	0.03	3.99842e-13	S7B_530381515(HI)	0	0		0			0	0			0	0	0	0	0	0	0	0	1	0	0	0	0		0	0		0	0	0.5			0	0		0	0	0	0	0
2018	Harvest index	S7D_12460271	7D	12460271	C/G	G	0.02	6.39916e-08	S7D_12460271(HI)	0	0	0.5	0.5	0	0	0.5	0.5	0.5	0	0	0	0.5	0	0	0	0.5	0	0	0.5	0	0.5	0	0	0	0.5	0	0.5	0	0	0	0.5	0	0	0	0	0	0	0.5	0
2018	Harvest index	S7D_385718003	7D	385718003	C/T	T	0.01	5.53645e-08	S7D_385718003(HI)	0	0	0	0	1	0	1	1	0	0	0	0	0	0	1	0	0	0		0	0	0	0	1	0	1	0	0	1		1	0	0	0	0	1	0	1		0
2017	Heading date	S1D_391967356	1D	391967356	G/A	A	1.86	1.59527e-07	S1D_391967356(HD)	0	0	1		0		0	0	0		1	0	0	0	0	0	1		0		0	0	0	0		0		0		0	0	0	0	0	0		0	0
2018	Heading date	S2B_680331940	2B	680331940	C/A	A	2.18	2.6162e-08	S2B_680331940(HD)	0	0	0.5	0	0	0	1	0	0.5	0	0	0		0	0	0	0	0		0	0	0	0	0	0	0	0	0	0		0	0.5	0	0		0	0	0	0	0.5
2017	Heading date	S2B_760862872	2B	760862872	A/G	G	-3.85	1.19868e-11	S2B_760862872(HD)	0	0	0		0			0	1	0	0	0	0	0	0	0	1	0	0			1		0	0	0	0	0	0	0	0	1	0	0	0	0	0		0	0
2017	Heading date	S4A_691718543	4A	691718543	T/C	T	-1.87	1.86308e-08	S4A_691718543(HD)	1	1	1	1	1	1	0	1	1	1	0	1	1	1	1	1	1	1	1	1	1	1	1		0	1	1	0	1	1	1	1	1	1	1	1	1	1	1	0
2018	Heading date	S5A_510255741	5A	510255741	T/C	T	-0.84	6.52591e-08	S5A_510255741(HD)	1	0.5	1	1			0		1	1		1		0.5	0	1	1	1	1		1	0.5	1	1	1	1		1	0	1	1	1			0	1			0	1
2018	Heading date	S5A_549160106	5A	549160106	C/T	T	-2.13	1.46993e-09	S5A_549160106(HD)	0	0	0	0	0	0	0	0	1	0	0	0	0	0	0	0	1	0	0	0	0	1	0	0	0	0	0	0	0	0	0	0	0	0	0	0	0	0	0	0
2018	Heading date	S5A_584618691	5A	584618691	C/A	C	-1.08	2.15397e-07	S5A_584618691(HD)	0	1	1	0	1	1	0	1	1	1	0	1	1	0	1		1	1	1	1	0	1	1	0	1	1	1	0	1	1	1	0	1	0	1		0	1	1	0
2018	Heading date	S5D_494053024	5D	494053024	C/G	G	-1.11	5.62012e-07	S5D_494053024(HD)	0	0	0	0	0	0.5	0	0	0.5	0	0	0	0	0	0	0	0.5	0	0	0	0	0.5	0	0	0	0	0	0	0	0	0.5	0	0	0	0	0	0	0	0	0.5
2018	Heading date	S7A_93033563	7A	93033563	T/C	C	1.69	1.29223e-08	S7A_93033563(HD)		0	1		0			0	0	0	0	0.5	0	0	0	0	0	0	0	0	0	0	0	0	0	0	0	0	0	0		0	0	1	0	0	0	0	0	0
2017	Leaf number	S1B_15099360	1B	15099360	C/T	C	-0.18	2.63034e-13	S1B_15099360(LFN)	1	1	0	1	1	0	1	0	0	0	0	0	0	1		1	0		1	0	0	0	0.5		1	1		0	0		1	1		1	0	1	1	1	0	1
2017	Leaf number	S1B_411990571	1B	411990571	G/C	G	0.16	1.9137e-07	S1B_411990571(LFN)	1	1	0	1	1	0	1	1	0	1	0	1	1	1	1	1	0	1	0	1		0	0	1	1	1	1	1	1	1	1	1		1	1	1	1		1	0
2017	Leaf number	S3B_85623433	3B	85623433	A/T	A	-0.22	7.11162e-08	S3B_85623433(LFN)	0.5	0.5	1	1	0.5	1	0.5	0.5	1	0.5	1	0.5	0.5	0	0.5	0.5	0	0.5		0.5	1	1	1	0.5	0	0.5	0.5	0.5	0.5	0.5	0.5	0.5	0.5	0.5	0.5	0.5	0.5	0.5	0.5	1
2018	Leaf number	S4D_455836980	4D	455836980	G/C	C	-0.13	1.02022e-06	S4D_455836980(LFN)	0	0	0	1	0	0	0	0	0	0	1	0	0	1		0.5	0	0	0		0	0	0	1	0	1	0	1	0		0	1	0	0	0	0	0	1	0	0
2017	Leaf rust	S1D_6789756	1D	6789756	A/C	A	6.04	6.81774e-10	S1D_6789756(LR)	0	1	1	1	0	1	1	1	1	0	1	1	1	1	0	0		0	1	1	1	1	0	0			0	1	0	0	1	1	0	1	0	0	0	0	1
2018	Leaf rust	S2A_21457330	2A	21457330	T/C	T	-10.04	7.30183e-11	S2A_21457330(LR)	0.5	0.5	1	1	1	0.5	1	0	1	1	1	0.5	1	1	0	0.5	1	0		0	0.5	1	1		0.5	0.5	1	0.5		1	0.5	0.5	1	1	1		1		0.5	0
2017	Leaf rust	S2A_35877256	2A	35877256	C/A	C	-4	2.24695e-07	S2A_35877256(LR)	1	1	0	1	1	1	0	0	1	1	0	1	1	1	1	1	1	1	1	0	1	1	1	1	1	1	0	1	1	1	1	1	1	0	1	0	1	1	1	0
2017	Leaf rust	S2B_31382175	2B	31382175	G/A	A	5.19	1.69956e-11	S2B_31382175(LR)	0	1	1	0	1	0	1	1	0	0	1	1	0	1	1	0	0	0	1	0	0	1	0.5	0	1	0	1	0	0	1	1	0	1	1	0	1	1	1	1	0
2018	Leaf rust	S3A_50747630	3A	50747630	A/G	G	-11.16	1.17987e-09	S3A_50747630(LR)	0		0	0	1	0	0	0	0	0	0	0	0	0		0	0	0	0	0	0	0	0	0	0	0	0	0	0	0	1	0	0	0	0	0	0	0		0
2017	Leaf rust	S3B_36628392	3B	36628392	A/G	G	-7.58	2.11842e-08	S3B_36628392(LR)	0	0	0		0	0	0	0	0	0	0	0		0	0	0	1	0	0	1	0	1	0	0	0	0	0	0		0	0	0	0	0	0	0	0	0
2018	Leaf rust	S3D_249430919	3D	249430919	A/G	G	-18.85	4.10026e-11	S3D_249430919(LR)		0	0	0	0	0	0	0	0	0	0	0	0	0	1	0	0	0.5	0			0	0	1	0	0	0.5	0	0	0.5	0	0	1	0	0	0	0	0.5	0	0
2017	Leaf rust	S4A_732004686	4A	732004686	T/C	C	8.24	1.73242e-07	S4A_732004686(LR)	0	0	0	0		1	0	0	0	0	0		0	0	0	0	0	0	0	0	0	0	1	0	0	1	0	0	0	0	1	0	0	0	0	0	0	0	0	0
2017	Leaf rust	S4D_150479219	4D	150479219	G/A	A	4.3	1.00475e-07	S4D_150479219(LR)	0	0	0	0	0	0	0	0	0.5	0.5	0	0	0.5	0.5	0.5	0.5	0.5	0	0	0	0	0	0	0	0	0	0.5	0	0	0	0	0	0	0	0	0.5	0	0.5	0.5	0
2018	Leaf rust	S5A_32764633	5A	32764633	G/A	A	16.13	6.91009e-08	S5A_32764633(LR)	0	0	0	0		0	0	0		0	0.5	0	0	0	0	0	0	0	0	0	0.5	0	0	0	0.5	0.5	0	0	0	0	0	0	0	0	0		0	0	0	0
2017	Leaf rust	S6B_501107290	6B	501107290	T/C	C	7.46	3.42429e-12	S6B_501107290(LR)	0	0	0	0	1	0	0	0	1	0	0	1	0	0	0	0	0	0	1	0	0	0	0	0	0	0	1	0	0	1	0	0	0	0	0	0	0	0	0	0
2018	Leaf rust	S7A_670504539	7A	670504539	G/C	G	10.24	3.2431e-09	S7A_670504539(LRAU)	0.5	0.5	0.5	0.5	0.5	0.5	1	0.5	0.5	0.5	0.5	0.5	0.5	0.5	0.5	0.5	0.5	0.5	0.5	0.5	0	0.5	1	0.5	0.5	0.5	0.5	0.5	0.5	0.5	0.5	0.5	0.5	0.5	0.5	0.5	0.5	0.5	0.5	0.5
2018	Leaf rust AUDPC	S1A_510452847	1A	510452847	G/A	G	-245.92	1.06752e-06	S1A_510452847(LRAU)	1	1	1	0.5	1	1	0.5	1	1	1	1	1	1	1	1	1	1	1	1	1	1	1	1	1	1	1	1	1	1	1	1	0.5	1	0.5	1	1	1	1	1	1
2018	Leaf rust AUDPC	S1B_560253737	1B	560253737	G/A	G	-332.22	1.18363e-13	S1B_560253737(LRAU)	1		1	1	1	1	1	0	1	1	1	1	1	1	1	1	1	0	1	0	1	1	1	1	1	1	1	1	1	1	1	1	1	1	1	1	1	1	1	1
2017	Leaf rust AUDPC	S1D_6226490	1D	6226490	G/A	G	-121.13	2.58241e-07	S1D_6226490(LRAU)	0	1	1	1	0	1	1	1	1	0	1	1	1	1	0	0	1	0	1	1	1	1	0	0	1	1	0	1	0	0	1	1	0	1	0	0	0	0	1	1
2017	Leaf rust AUDPC	S3B_36628392	3B	36628392	A/G	G	-137.81	2.74417e-07	S3B_36628392(LRAU)	0	0	0		0	0	0	0	0	0	0	0		0	0	0	1	0	0	1	0	1	0	0	0	0	0	0		0	0	0	0	0	0	0	0	0
2017	Leaf rust AUDPC	S5A_574195229	5A	574195229	G/A	A	125.56	7.21057e-07	S5A_574195229(LRAU)	0	1	0	0	1	0	0	0	0	0	0	1	0	0	0	0	0	1	0	0	0	0	0	0	0	0	0	0	0	0	0	0	1	0	0	0	0		1	0
2017	Leaf rust AUDPC	S6A_610211705	6A	610211705	C/T	T	-98.28	5.22056e-08	S6A_610211705(LRAU)	0	1	1	0	0	1	0	0	1	0	1	0	0	0	0	0	1	0	0	0		1	0.5	1	1	1	0	1	0	0	1	0	0		0		0	0	0	0
2017	Leaf rust AUDPC	S6B_501107290	6B	501107290	T/C	C	125.57	5.88576e-08	S6B_501107290(LRAU)	0	0	0	0	1	0	0	0	1	0	0	1	0	0	0	0	0	0	1	0	0	0	0	0	0	0	1	0	0	1	0	0	0	0	0	0	0	0	0	0
2018	Leaf rust AUDPC	S6D_83156449	6D	83156449	T/A	A	209.72	2.55792e-07	S6D_83156449(LRAU)	0	0	0	0	0	0	0	0	0.5	0	0	0	0	0	0	0	0	0	1	0	0	0.5	0	0	0	0	0	0	0	0	0	0	0	0	0	0	0	0	0	0
2018	Number of plants	S1A_440183259	1A	440183259	C/T	C	-3.4	6.05087e-07	S1A_440183259(PLN)	0.5	1	1		0.5	1	1	0.5	1	1	1	0.5	0.5	0.5	0.5	0.5	1	0.5	1	0.5	1	1	1	0	1	0.5	1	0.5	0.5	0.5	1	0.5	0.5	1	0.5	0	0.5	0.5	1	1
2018	Number of plants	S1D_307421004	1D	307421004	A/G	G	7.2	1.954e-11	S1D_307421004(PLN)	0	0	1	0	0		0	0	0	0	0	0	0	0	0	0	0	0	0		0	0	0	0	0	0	0	0	0	0	0	0	0	0	0	0	0	0		1
2018	Number of plants	S6D_470516691	6D	470516691	G/A	A	-2.34	3.87024e-10	S6D_470516691(PLN)	0	0		0.5	0.5	0.5	0	0.5	0	0.5	0	0	0	0	0.5	0	0	0.5		0.5			0.5	0.5	0	0	0	0.5		0	0		0	0.5	0.5		0	0.5	0
2017	Number of plants	S7A_100624533	7A	100624533	T/C	T	8.59	2.2562e-07	S7A_100624533(PLN)	1		0.5	1	1	1	1	1	0.5	1	0.5	1	1	1	1	1	0.5	1	1	1	1	1	1	1	1	1	1	1	1	1	1	1	1	0.5	1		1		1	0.5
2017	Number of plants	S7A_100624536	7A	100624536	C/G	G	8.59	2.2562e-07	S7A_100624536(PLN)	0		0.5	0	0	0	0	0	0.5	0	0.5	0	0	0	0	0	0.5	0	0	0	0	0	0	0	0	0	0	0	0	0	0	0	0	0.5	0		0		0	0.5
2017	Number of plants	S7A_100624582	7A	100624582	G/A	G	8.59	2.2562e-07	S7A_100624582(PLN)	1		0.5	1	1	1	1	1	0.5	1	0.5	1	1	1	1	1	0.5	1	1	1	1	1	1	1	1	1	1	1	1	1	1	1	1	0.5	1		1		1	0.5
2017	Number of plants	S7D_75136077	7D	75136077	C/A	A	-8.81	9.15855e-07	S7D_75136077(PLN)	0	0	1	0	0	0	0	0	1	0	1	0	0	0	0	0	1	0	0	0	0	0	0	0	0	0	0	0	0	0	0		0	1	0	0	0	0	0	1
2017	Number of plants	S7D_75136112	7D	75136112	G/A	A	-8.81	9.15855e-07	S7D_75136112(PLN)	0	0	1	0	0	0	0	0	1	0	1	0	0	0	0	0	1	0	0	0	0	0	0	0	0	0	0	0	0	0	0		0	1	0	0	0	0	0	1
2017	Number of plants	S7D_75357650	7D	75357650	G/A	A	-8.81	9.15855e-07	S7D_75357650(PLN)	0	0	1	0	0	0	0	0	1	0	1	0	0	0	0	0	1	0	0	0	0	0	0	0	0	0	0	0	0	0	0	0	0	1	0	0	0	0	0	1
2017	Number of plants	S7D_95102953	7D	95102953	C/T	T	8.81	9.15855e-07	S7D_95102953(PLN)	0	0	1	0	0	0	0	0	1	0	1	0	0	0	0	0	1	0	0	0	0	0	0	0	0	0	0	0	0	0	0	0	0	1	0	0	0	0	0	1
2018	Number of productive tillers	S1A_44980981	1A	44980981	T/C	C	-0.13	1.52558e-08	S1A_44980981(TILN)	0	0	0	0	0	0	0	0	1	0	0	0	0	0	0	0	1	0	0	0		0	0	0	0	0	0	0	0	0	0	0	0	0	0	0	0	0	0	1
2018	Number of productive tillers	S2B_765035168	2B	765035168	C/T	C	-0.15	1.06465e-11	S2B_765035168(TILN)	1	0.5	1	1	0.5	1	1	1	1	1	1	1	0.5	1	1	1	1	1	0.5	0.5	1	1	1	1	1	1	1	1	1	1	1	1	1	1	1	0.5	0.5	1	1
2018	Number of productive tillers	S2D_10070953	2D	10070953	T/A	T	0.08	3.82381e-08	S2D_10070953(TILN)		1	1		1	1		1	1	1	0	1	1	1	1	1	0.5	1	1	1	1	0.5		0	1	1	1	1		0.5	1	1	1	1	1		0.5	1		0.5
2018	Number of productive tillers	S2D_579472210	2D	579472210	A/T	T	0.06	8.76873e-08	S2D_579472210(TILN)	0	0.5	0.5	0.5	0.5	0	0.5	1	1	0.5	0.5	1	0.5	0		0	0		0	1	0	0.5	1		0	0		0	1	1	0	0.5	1	0.5	1		1	1	0.5	0.5
2018	Number of productive tillers	S3D_282956863	3D	282956863	C/G	G	0.06	1.7473e-08	S3D_282956863(TILN)	0	1	0		0	0	0	0	0	1	0	0	1	0	0	0	0	0	1	0		0	1	0	0	0	0	0	1	0	0	0	0	0	0	1	1	0	0	0
2018	Number of productive tillers	S5A_354894125	5A	354894125	T/C	C	-0.05	7.30114e-07	S5A_354894125(TILN)	0		0.5	1	1	0	0	0.5	0	0.5	0	0	0	1	0	0	0	0.5	0	0	0.5	0.5	0	0	1	0	1	0	0	1	0.5		0.5		0	0.5	0.5	1	0	0
2018	Number of productive tillers	S5B_310794551	5B	310794551	A/G	G	0.09	5.48541e-08	S5B_310794551(TILN)	0.5	0	0.5	0.5	0	1	0	0.5	0.5	0	0	0.5	0.5	0.5	0	0.5	0	0.5	0.5	0	0.5	0	0	0.5	0.5	0.5	0.5		0	1	0.5	0	0.5	0	0.5	0.5	0.5	0.5	0.5	0
2018	Number of spikes	S1A_440183259	1A	440183259	C/T	C	-6.96	5.58016e-07	S1A_440183259(SPKN)	0.5	1	1		0.5	1	1	0.5	1	1	1	0.5	0.5	0.5	0.5	0.5	1	0.5	1	0.5	1	1	1	0	1	0.5	1	0.5	0.5	0.5	1	0.5	0.5	1	0.5	0	0.5	0.5	1	1
2018	Number of spikes	S3A_650197388	3A	650197388	T/C	T	3.68	1.0668e-06	S3A_650197388(SPKN)	1	1	1	0	1	0	0	0	1	1	0	1	1	0	0	1	1	1	1	0	0	1		0	0	0	1	0	1	1	1	0	0	1	1		0	1	1	0
2018	Number of spikes	S3D_385387350	3D	385387350	G/A	G	11.08	1.00811e-07	S3D_385387350(SPKN)	1	1	1		1	1	1	1	1	1	1	1	1	1	0	1	1	0.5	1	1	1	1	1	1	1	1	0.5	1	1	1	1	1	0.5	1	1	1	1	1	1	1
2018	Number of spikes	S6D_104966449	6D	104966449	G/A	G	7.8	5.23437e-08	S6D_104966449(SPKN)	1	0.5	1	1	1	0.5	0.5	1	1	1	0.5	1	1	1	1	1	0.5	0.5	1	0.5		1	0.5	0.5	0.5	0.5	0.5	0.5	1	1	0	0.5	0.5	0.5	0.5	1	0.5	0.5	1	1
2017	Number of spikes	S7A_100624533	7A	100624533	T/C	T	12.94	9.03276e-07	S7A_100624533(SPKN)	1		0.5	1	1	1	1	1	0.5	1	0.5	1	1	1	1	1	0.5	1	1	1	1	1	1	1	1	1	1	1	1	1	1	1	1	0.5	1		1		1	0.5
2017	Number of spikes	S7A_100624536	7A	100624536	C/G	G	12.94	9.03276e-07	S7A_100624536(SPKN)	0		0.5	0	0	0	0	0	0.5	0	0.5	0	0	0	0	0	0.5	0	0	0	0	0	0	0	0	0	0	0	0	0	0	0	0	0.5	0		0		0	0.5
2017	Number of spikes	S7A_100624582	7A	100624582	G/A	G	12.94	9.03276e-07	S7A_100624582(SPKN)	1		0.5	1	1	1	1	1	0.5	1	0.5	1	1	1	1	1	0.5	1	1	1	1	1	1	1	1	1	1	1	1	1	1	1	1	0.5	1		1		1	0.5
2017	Number of spikes	S7A_113458166	7A	113458166	T/A	A	-18.6	6.17788e-07	S7A_113458166(SPKN)	0	0	0	0	0	0	0	0	0.5	0	0.5	0		0	0	0	0.5	0	0		0	0	0	0	0	0	0	0	0	0	0	0.5	0	0.5	0		0	0	0	0.5
2018	Peduncle length	S1D_456199885	1D	456199885	G/A	A	3.58	2.13089e-07	S1D_456199885(PDLN)	0	0	0.5	0	0	0	0	0	0	0.5	1	0	0	0	0.5	0		0	0	0.5		0	0	0	0	0	0	0.5	0	0	0.5	0	0	0	0	0	0.5	0.5	1	0
2017	Peduncle length	S2B_13271827	2B	13271827	A/G	G	-1.44	1.41947e-07	S2B_13271827(PDLN)	1		1		0	0		0	0	0		0		0	0	1	0	0		1	0	0	0	0		0	0	0	0.5	1	0	0	0.5	0	0	0		0	0	0
2018	Peduncle length	S4A_732825683	4A	732825683	G/T	G	-4.71	1.38307e-07	S4A_732825683(PDLN)	1	1	1	1		0	1	1	1	1	1		1	1	1	1	1	1	1	1	1	1	0	1	1	1	1	1	1	1	0	1	1	1	1	1	1	1	1	1
2017	Peduncle length	S4B_13990601	4B	13990601	T/C	C	1.85	4.04417e-08	S4B_13990601(PDLN)	0	0	0	0	0	1	1	0	1	0	0	0	0	0	0	0	0	0	0	0	0	0	0.5	0	0	0	0	0	0	0	0	0	0	1	0	0	0	0	0	0
2017	Peduncle length	S6B_715980886	6B	715980886	T/C	T	-1.62	1.24299e-07	S6B_715980886(PDLN)	1	1	1	0	1		0.5	1	1	1	0	1	1	1	1	1	1	1	1	1	0	1	1	1	1	1		1	1	1	1	0	0	0	1	1	1	1	1	0
2017	Peduncle length	S7A_51567055	7A	51567055	G/C	C	-1.4	4.94045e-07	S7A_51567055(PDLN)	0	0	0.5	0.5		0	0	0	0.5	0	0	0	0		0.5	0.5	0.5	0	0	0		0.5	0	0.5	0	0.5	0	0	0	0.5	0	0.5	0	0.5	0	0	0	0.5		0.5
2017	Peduncle length	S7A_606181588	7A	606181588	C/T	C	1.17	2.62124e-07	S7A_606181588(PDLN)	0.5	0.5	0.5	1	1	1	1	1	1	1	1	0.5	0.5	1	1	0.5	1	0.5	1	1	1	1	1	1	1	1	0.5	1	0.5	0.5	1	1	0.5	1	0.5	1	1	0.5	0.5	1
2017	Peduncle length	S7B_595077876	7B	595077876	C/T	T	-2.74	1.4904e-12	S7B_595077876(PDLN)	0	0	0	0	0	0	0	0	1	0	0	0	0	0	0	0	0	0	0	0		0	0	0	0	0	0	0.5	0	0	0	0	0		0		0	0	0	0
2017	Plant height	S1B_592980154	1B	592980154	A/G	A	4.37	2.42363e-07	S1B_592980154(PHT)	0.5	0.5	0.5	0	0.5	0.5	1	0.5	1	0.5	0.5	0.5	0.5	0	0	0.5	1	0.5	0.5	0.5	0.5	0.5	1	0.5	0.5	0.5	0.5	0.5	0.5	0.5	0.5	0.5	0	1	0.5	0.5	0.5	0.5	0.5
2018	Plant height	S1D_457219860	1D	457219860	C/A	C	-3.08	1.90099e-08	S1D_457219860(PHT)	1	1	0	1	1	1	1	1	1	1	1	1	1	1	1	1	0	1	1	1	1	1	1	1	1	1	1	1	1	1	1	1	1	1	1	1	1	1	1	1
2017	Plant height	S3A_691450972	3A	691450972	G/A	A	3.69	5.33518e-07	S3A_691450972(PHT)	0	0	0	0	0	0	1	0	0	0	0	0	0	0	0	0		0	0	0		0	0	0	0	0	0	0	0	0	0	0	0	0	0	0	0	0	0	1
2017	Plant height	S4A_732825683	4A	732825683	G/T	T	-4.74	1.45703e-08	S4A_732825683(PHT)	0	0	0	0		1	0	0	0	0	0		0	0	0	0	0	0	0	0	0	0	1	0	0	0	0	0	0	0	1	0	0	0	0	0	0	0	0	0
2017	Plant height	S5A_584712144	5A	584712144	C/T	C	5.02	8.30484e-15	S5A_584712144(PHT)	0	1	1	0	1	1	0	1	1	1	0	1	1	0	1	0	1	1	1	1	0	1	1	0	1	1	1	0	1	1	1	0	1	0	1	1	0	1	1	0
2018	Plant weight with roots	S1B_453188672	1B	453188672	C/T	T	0.25	1.82102e-07	S1B_453188672(PWRT)	1	0	0	1	1	0	0	1	0	0	0	1	1	1	1	1	0	1	0	1	0	0	0	1	0	1	0	1	1	1	0	1	1	0	1	1	1	1	0	0
2018	Plant weight with roots	S1B_481542978	1B	481542978	A/T	A	-0.47	2.40846e-09	S1B_481542978(PWRT)	1	1	1	1	1	0	1		1	1		1	1	1	1	1	1	1	0	1	1	1	0	1	1	1	1	1	1	1	1	1	1	1	1	1	1		1	1
2018	Plant weight with roots	S1D_10398574	1D	10398574	C/G	G	0.3	2.18313e-07	S1D_10398574(PWRT)	0	0	0.5	0	0.5	0.5	0	0.5	0	0	0.5	0	0	0	0.5	0	1	0	0	0.5	0.5	0	1	0.5	1	0	0	0.5	0	0	0	0	0.5	0	0	0.5	0.5	0.5	0	1
2017	Plant weight with roots	S2D_22339914	2D	22339914	T/C	C	-0.87	8.93233e-14	S2D_22339914(PWRT)	0	0	0		0	0	1	0		0	0	0		0	0	0	0	0	0	0	1	0	0	0	0	0	0	1	0	0	0	1	0	1	0	0	0	0	0	1
2017	Plant weight with roots	S3A_737554024	3A	737554024	G/A	G	0.37	2.60941e-07	S3A_737554024(PWRT)	0	0	0	0.5	0			0	1	0	1	0	0	0	1	0	1	0	0	0	1	1	0	0	0	1		1	0	0	0		1	1	1	0	0.5	1	0	1
2018	Plant weight with roots	S3B_246145297	3B	246145297	A/C	A	-0.2	9.01689e-07	S3B_246145297(PWRT)	1	1	0	1	1	1	0	1	0	1	1	0	1	1	1	1	0	0		0		0	1	1	1	1	0	0	1	1	1	0	1		1		1	1	0	1
2018	Plant weight with roots	S3B_25180892	3B	25180892	A/G	A	-0.22	3.1795e-07	S3B_25180892(PWRT)	1	1	0	1	1	1	0	0	1	1	1	0	0	1	1	1	0	0	1	0	1	0	0	1	0	0	1	1	0	1	1	1	1	0	1	0	1	1	1	1
2017	Plant weight with roots	S5A_584618691	5A	584618691	C/A	A	-0.78	6.36613e-11	S5A_584618691(PWRT)	1	0	0	1	0	0	1	0	0	0	1	0	0	1	0		0	0	0	0	1	0	0	1	0	0	0	1	0	0	0	1	0	1	0		1	0	0	1
2018	Plant weight with roots	S5B_426587161	5B	426587161	G/A	G	0.43	1.28657e-07	S5B_426587161(PWRT)	0.5	0.5	0.5	0.5	1	1	1	0.5	0.5	0.5	0.5	0.5	0.5	1	1	0.5	1	0.5	0.5	1	0.5	0.5	1	1	0.5	1	1	1	0.5	0.5	0.5	0.5	0.5	1	0.5	1	0.5	0.5	0.5	1
2017	Powedery mildew	S2B_81993637	2B	81993637	T/A	A	0.82	3.20421e-07	S2B_81993637(PDML)	0	0	1	0	0	0	1	0	0	0	0	0	0	0	0	0	0	0	0	0	0	0	0	0	0	0	0	0	0	0	0	0	0	0	0	0	0	0	0	0
2017	Powedery mildew	S2D_130728324	2D	130728324	G/C	C	1.23	1.99091e-09	S2D_130728324(PDML)	0	0	0	0	0	0	1	0	1	0	0	0	0	0	0	0	1	0	0	0	0	1	0	0	0	0	0	0	0	0	0	0	0	0.5	0	0	0	0	0	0
2017	Powedery mildew	S3A_568974346	3A	568974346	C/A	C	-0.43	3.51555e-07	S3A_568974346(PDML)	1	1	0	0.5	1		1	0	1	1	0	1	1	0	1	1	1	1	0	0	1	1	1		0	0		0	1	1		0.5	1	1	1	1	0	1	1	1
2017	Powedery mildew	S4A_708680733	4A	708680733	C/T	C	0.67	5.71096e-07	S4A_708680733(PDML)	1	1	1	1	1	1		1	1	1	1		1	1	1	1	1	1	1	1	1	1		1	1		1	1	1	1	0	1	1	1	1	1	1	1	1	1
2017	Powedery mildew	S5B_631643964	5B	631643964	G/C	G	-0.46	5.04171e-08	S5B_631643964(PDML)	1	0	1	0	0	1	1	0	1	1	0.5	0	1	0	0	1	1	1	0	1	1	1	1	0	0	0	1	0	0	1	0	0	0	1	1	0	0	0	0	1
2017	Powedery mildew	S6D_5824400	6D	5824400	C/T	C	1.2	2.85078e-11	S6D_5824400(PDML)	1	0.5	1	1	1	1		1		1	1	1	0.5		1	1	1	1	0	1			1	0.5	1	1	1	1	1	1	1	1	1	1	1	1	1	1	1	0
2018	Powedery mildew	S6D_5824400	6D	5824400	C/T	C	0.86	4.42608e-07	S6D_5824400(PDML)	1	0.5	1	1	1	1		1		1	1	1	0.5		1	1	1	1	0	1			1	0.5	1	1	1	1	1	1	1	1	1	1	1	1	1	1	1	0
2017	Protein content	S1A_444168255	1A	444168255	A/G	G	0.69	1.06417e-08	S1A_444168255(GPC)	0	0	1	0	0	0	0	0	0		0.5	0	0		0		1	0	0			0	0	0	0	0			0	0	0		0	0	0		0	0	0	0
2017	Protein content	S1D_6719537	1D	6719537	T/C	T	0.39	2.51065e-09	S1D_6719537(GPC)	0	1	1	1	0	1	1	1	1	0	1	1	1	1	0.5	0	0	0.5	1	1	1	1	0	0.5			0.5	1	0	0.5	1	1	0.5	1	0	0	0	0.5	1	0
2017	Protein content	S2A_750550946	2A	750550946	G/T	T	0.55	1.12467e-08	S2A_750550946(GPC)	0	0	0	0	0	0	0	0	0	0	0	0	0	0	0	0	0	0	0	0	0	0	0	0	0	0	0	0	0	0	1	0	0	0	0	0	0	0	0	0
2017	Protein content	S2D_323648225	2D	323648225	A/G	G	0.44	2.03823e-08	S2D_323648225(GPC)	0	0	0	0	0	0	0.5	0	0	0	0	0	0	0	0	0	0.5	0	0	0	0	0.5	0	0	0	0	0	0.5	0	0	0	0	0	0.5	0	0	0	0	0	0.5
2017	Protein content	S2D_643258624	2D	643258624	C/G	C	-0.81	1.55876e-09	S2D_643258624(GPC)	1	1	1	0.5	1	1	0.5	1	0.5	1		1	1		1	1	1	1	1	1	0.5	0.5	1	1	1	1	1	1	1	1	1	1	1			1	1	1	1	1
2017	Protein content	S3A_731550097	3A	731550097	G/A	A	-0.67	2.01203e-07	S3A_731550097(GPC)	0	0.5	0		0.5	0	0	0		0		0.5		0	0	0	0	0	0		0	0	0	0	0.5	0.5	0	0	0.5		0.5	0	0	0	0	0	0	0	0
2018	Protein content	S3B_17974304	3B	17974304	T/A	T	0.32	6.54515e-08	S3B_17974304(GPC)	1	1	1	1	0.5	1	1	1	1	1	1	0.5	1	1	1	1	1	1	0.5	1		1	1	1		1	1		1	1	0.5	0.5	1	1	1	1	1	1		1
2017	Protein content	S4A_11986495	4A	11986495	G/A	G	0.25	3.61002e-07	S4A_11986495(GPC)	0	0	0	0.5	1	1	0.5	0	1	1	1	1	0	0	1	0	1	0	1	0	1	1	0.5	1	0.5	0.5	0	0	1	1	1	0.5	1	1	1	0	1	1	0	0.5
2017	Protein content	S5B_684230407	5B	684230407	T/A	A	-0.63	1.27573e-10	S5B_684230407(GPC)	0	0	0	0	0	1	0	0	0	0	0	0	0	1	0	0	0	0	0	0		0	1	0		0	0	0	0	0	0	0	0	0	0	0	0	0	0	0
2017	Root diameter	S4A_140700711	4A	140700711	A/C	C	0.02	2.03968e-07	S4A_140700711(RTDIA)	0	0	0	0	0	0	0	0	0	0	0	0.5	0	0	0	0	0	0	0	0	0	0	0	0	0	0.5	0	0.5	0	0	0.5	0	0.5	0	0.5	0	0	0.5	0.5	0.5
2017	Root diameter	S5D_494053024	5D	494053024	C/G	C	-0.05	1.93953e-11	S5D_494053024(RTDIA)	1	1	1	1	1	0.5	1	1	0.5	1	1	1	1	1	1	1	0.5	1	1	1	1	0.5	1	1	1	1	1	1	1	1	0.5	1	1	1	1	1	1	1	1	0.5
2017	Root diameter	S6A_13685903	6A	13685903	G/C	C	-0.22	5.04868e-10	S6A_13685903(RTDIA)	0	0	0	0	0		0	0	0	0	0	0	0	0	0	0	0	0	0	0	0	0		0	0		0	0	0	0	0	0	0	0	0	0	0	0	0.5	1
2017	Root volume	S2D_506778844	2D	506778844	T/G	G	-0.24	7.86575e-14	S2D_506778844(RTVL)	0	0	0	0	0	0	0	0		0	1	0	0	0	0	0	0	0	0	0		0	0	0	0	0	0	1	0	0	0	0	0	0	0	0	0	0	0	1
2017	Root volume	S3B_25372664	3B	25372664	G/T	T	0.13	3.88909e-07	S3B_25372664(RTVL)	0	0	0	0.5	0	0	0	0		0	1	0		0			0	0	0	0	1	0	0	0	0	0	0	1	0	0	0	0	0	0	0	0	0	0		1
2017	Root volume	S3B_814148012	3B	814148012	G/A	G	0.15	1.1534e-10	S3B_814148012(RTVL)	1	1	0	1	1		0	1		1	1	1		1	1	1	0	1	1	1	0	0	1	1	1	1	1	0		1	1	1	1	0.5	1		1	1	1	0
2017	Root volume	S4D_498573207	4D	498573207	G/C	C	-0.16	1.65886e-10	S4D_498573207(RTVL)	0	0	0	0	0	0	0	0	0	0	0	0	0	0	0	0	1	0	0	0	0	0	0	0	0	0	0	0	0	0	0	0	0	0	0	0	0	0	0	0
2017	Root volume	S5A_578837330	5A	578837330	G/A	G	0.16	5.65602e-07	S5A_578837330(RTVL)	1	1	1	1	1	1	0.5	1	0	1	0.5	1	1	1	1	1	0.5		1	1	1	1	0.5	1	1	1	1	1	1	1	1	1	1	0.5	1	1	1	1	1	1
2017	Root volume	S7A_477184977	7A	477184977	T/C	C	-0.12	2.88478e-07	S7A_477184977(RTVL)	0	0	0	0	0	0	0	0	0	0	0	0	0	0	0.5	0	0	0.5	0	0	0	0	0	0.5	0	0	0.5	0	0	0.5	0	0	0.5	0	0	0	0	0.5	0	0
2017	Root volume	S7D_27486623	7D	27486623	G/A	A	-0.15	2.40915e-09	S7D_27486623(RTVL)	0	0	0	0	0	0	0	0	0	0	1	0	0	0	0	0	0	0	0	0	0	0	0	0	0	0	0	0	0	0	0	0	0	1	0	0	0	0	0	1
2017	Root volume	S7D_78215549	7D	78215549	C/T	C	-0.26	1.16445e-14	S7D_78215549(RTVL)	1	1		1	1	1	1	1	0	1		1	1	1		1	0	1	1	1		1	1	1	1	1	1	1		1	1		1	0	1		1	1	1
2018	Septoria	S1B_671235894	1B	671235894	C/T	T	-0.49	3.10973e-08	S1B_671235894(SEPT)	0	0	0	1	0	0	0	0		0	0	0	0	0	0	0	1	0		0	1	1	0	0	0	0	0	0	0	0	0	1	0	0	0		0	0	0	0
2018	Septoria	S2D_139111176	2D	139111176	G/A	G	-0.34	1.13045e-08	S2D_139111176(SEPT)	1	1	1	0	1	1	1	1	1	1		1	1	1	1	1	1	1	1	1		1	1	1	1	1	1	0	1	1	1	0	1	1	1	1	1		1	1
2018	Septoria	S7B_643501119	7B	643501119	G/A	A	0.62	3.1449e-11	S7B_643501119(SEPT)	0	0	0.5	1	0	0	0	0	0.5	0	0.5	0	0	0	0	0	0.5	0	0	0	0	0.5	0	0	0	0	0	0	0	0	0	0.5	0	0.5	0	0	0	0	0	0.5
2017	Spike density	S3B_770476311	3B	770476311	T/C	C	-1.63	2.72546e-07	S3B_770476311(SPDN)		0	0	0	0	0	0		0	0	0.5	0	0	0	0	0	0	0	0	0		0	0	0	0	0			0	0	0	0	0	0	0	0	0	0
2017	Spike density	S3B_770476326	3B	770476326	A/G	G	1.63	2.72548e-07	S3B_770476326(SPDN)		0	0	0	0	0	0		0	0	0.5	0	0	0	0	0	0	0	0	0		0	0	0	0	0			0	0	0	0	0	0	0	0	0	0
2017	Spike density	S3B_770476333	3B	770476333	T/C	C	-1.63	2.72546e-07	S3B_770476333(SPDN)		0	0	0	0	0	0		0	0	0.5	0	0	0	0	0	0	0	0	0		0	0	0	0	0			0	0	0	0	0	0	0	0	0	0
2017	Spike harvest index	S1A_514041459	1A	514041459	G/A	G	0.06	1.37429e-08	S1A_514041459(SPHI)	1	1	1	1	1			1	1	1	1	1	1	1	1		1	1	1	1	1	1	1	1	1	1		1		1	1		1	1	1	1	1	1	1
2018	Spike harvest index	S2D_405601286	2D	405601286	A/C	A	-0.02	9.36438e-10	S2D_405601286(SPHI)	1	1	1	0	1	1	0	1	1	1	1	1	1	1	1	1	0	1	1	1	0	0	1	1	1	1	1	0	1	1	1	0	1	1	1	1	1	1	1	0
2018	Spike harvest index	S3A_274890899	3A	274890899	T/A	T	0.03	4.93122e-08	S3A_274890899(SPHI)	1	1	1	0.5	1	1		1	1	1	1	1	1		1	1	1		1	1		1	1	1	1		1	0	1	1	1	0.5	1		1	1	1	1	1	0.5
2018	Spike harvest index	S3A_523055392	3A	523055392	A/G	G	0.02	1.69531e-10	S3A_523055392(SPHI)	0	0	0	0.5	0	0	0	0	1	1	0.5	0	0	0.5	0	0	0	0	0	0		0.5	0.5	0	0.5	0	0	0	0	0.5	0	0	0.5	0.5	0.5	0	0	0	0	0.5
2017	Spike harvest index	S3B_754948481	3B	754948481	G/A	G	0.02	1.17083e-07	S3B_754948481(SPHI)	1	0.5	1	1	1	1	1	1	1	1	1	1	1	1	1	1	1	1	1	1	1	1	1	1	1	1	1	1	1	1	1	1	1	0.5	1	1	1	1	1	1
2017	Spike harvest index	S6D_11346440	6D	11346440	T/C	C	-0.03	4.0319e-07	S6D_11346440(SPHI)	0	0	0	0	0	0	0	0		0	0	0	0	0	0	0	0	0		0	1		0	0	0	0	0	0	0	0	0	0	0	0	0	0	0	0	0
2018	Spike harvest index	S7A_706764955	7A	706764955	C/G	C	-0.01	5.48128e-09	S7A_706764955(SPHI)	1	1	1	1	1	1	1	1	1	0	1	1	1	1	1	1	1	0	1	1	1	1	1	1	0	1	0	1	1	1	1	1	0	1	1	1	1	1	0	1
2017	Spike harvest index	S7A_83275301	7A	83275301	C/T	T	0.02	1.97488e-08	S7A_83275301(SPHI)	0	0	0.5	0	0	0	0	0	0.5	0	0.5	0	0	0	0	0	0.5	0	0	0	0	0	0	0	0	0	0	0	0	0	0	0.5	0	0.5	0	0	0	0	0	0.5
2017	Spike length	S1B_591225142	1B	591225142	G/A	A	-0.4	1.77709e-09	S1B_591225142(SPKLN)	0	0		0	0	1	1	0	0	0	0	0	0	0	0	0	1	0	0	0	0	0	0	0	1	1		0	0	0	0	0	0	1	0	0	0	0	0	0
2018	Spike length	S2B_651360266	2B	651360266	T/C	T	0.22	2.46187e-07	S2B_651360266(SPKLN)	1	0	1	0	0		1	1	1	0	0	0	1	1	1	1	1	0	1	0	1	1	1	0	1	1	1	1	1		0	0	1	1	1	0	1	0	0	0
2018	Spike length	S2B_744869741	2B	744869741	C/G	C	-0.26	2.0387e-07	S2B_744869741(SPKLN)	0	1	0	1	1	1	0	1	1	0.5	1	0		0.5	1	0	0	0.5		1	1	1		1	0	0	0	1	0.5	0	1	1	0	1	0	0	0	1	0.5
2018	Spike length	S3B_246146527	3B	246146527	C/T	T	0.4	1.67701e-07	S3B_246146527(SPKLN)	0	0	0	0	1	0	0	0	0	0	0	0	0	0	1	0	0	0	0	0	0	0	0	1	0	0	0	0	0		0	0	1	0			0	1		0
2018	Spike length	S3D_600173740	3D	600173740	C/T	C	-0.38	6.74242e-14	S3D_600173740(SPKLN)	1	0	0	0	0	0	0.5	0	0	1	0	0	1	1	0	1	0.5	0	1	1	0	0	0	1	1	1	1	0.5	0	1	1	0	1	1	1	1	1	0	1	0
2017	Spike length	S4B_197213346	4B	197213346	T/C	T	0.26	9.1439e-07	S4B_197213346(SPKLN)	0	1	0.5	0.5	0			0.5		0.5	1	0.5	0.5	0.5	0.5	0		0	0	0.5	1	1	0.5		0.5		1	0.5	0.5	1	0.5	0.5	1	0	0.5	0.5	1		1	1
2018	Spike length	S6A_16407205	6A	16407205	T/C	C	-0.25	5.35082e-07	S6A_16407205(SPKLN)	1	1	0	0	0	0	0	0	0	0	0	0	0	0	1	1	0	0	0	0	0	1	0	1	0	1	0	0	0	0	1	0	0	0	0	0	0	1	0	0
2017	Spike length	S6B_158074944	6B	158074944	A/T	A	-0.34	9.28803e-08	S6B_158074944(SPKLN)	1	1	1	1	1	1	1	1	1	1	1	1	1	1	1	1	0.5	1	1	1	0.5	0.5	1	1	1	1	1	1	1	1	1	1	1	1	1	1	1	1	1	0.5
2018	Spike length	S6B_4874543	6B	4874543	A/C	A	-0.43	3.81509e-08	S6B_4874543(SPKLN)	1	1	1	0.5	1	0	1	1	0	1	0	1	1	1	1	1	0	1	1	1	1	0	1	1	1	1	1	1	1	1	1	1	1	1	1	1	1	1	1	1
2017	Spike length	S7B_638491985	7B	638491985	C/T	T	0.24	8.72605e-07	S7B_638491985(SPKLN)	0	0	0	0	0	0	0	0	0	0	0	0	0	0	1	0	0	1	0	0	0	0	0	1	1	1	1	0	0	0	0	0	1	0	0	0	0	1	0	0
2018	Spike weight	S1B_457535596	1B	457535596	C/T	T	0.15	6.87064e-07	S1B_457535596(SPWT)	0	0	0	1	1	0	0	1	0	1	0	1	1	1	1	0	0	1	0	1	0	0	0	1	0	1	0	1	0	1	0	1	1	0	0	1	1	1	0	0
2017	Spike weight	S2D_100431648	2D	100431648	C/G	G	0.22	3.5874e-16	S2D_100431648(SPWT)		0	0	1	0	0	0	0	0	0	0	0	0	0	0	0	0	0	0	0	1	0	0	0	0	0	0	0	0		0	1	0	0.5	0	0	0	0	0	0
2018	Spike weight	S4D_455763126	4D	455763126	G/A	A	-0.15	3.7907e-07	S4D_455763126(SPWT)	0	0	0	1	0	0	0	0	0	0	1	0	0	1	1	0	0	0	0	0	0	0	0	1	0	1	0	1	0	1	0	1	0	0	0	0	0	1	0	0
2017	Spike weight	S5B_487919184	5B	487919184	C/G	G	0.1	2.65873e-10	S5B_487919184(SPWT)	0	0	0	1	0	1	0	1	0	0	0	0	0	0	1	0	0	1		0	1	0	0	1	1	1	1	1	1	0	0		0	0	0	0	0	1	1	0
2017	Spike weight	S5D_11007150	5D	11007150	T/C	C	-0.14	3.83777e-08	S5D_11007150(SPWT)	0	0	1	0	0		1	0		0	0	0	0	0	0	0	1	0	0	0	0	0	0	0	0	0	0	1	0	0	0	0	0	1	0	0	0	0		1
2017	Spike weight	S7A_57322841	7A	57322841	G/A	G	-0.16	1.37361e-07	S7A_57322841(SPWT)	1	1	1	1	1	1	1	1		1	1	1	1		0.5	1		1	1	1	1		1	0.5	1	1	1	1	1	0.5	1	1	1	1	1		1	0.5	1	1
2017	Spike weight	S7B_700568702	7B	700568702	G/A	G	0.09	6.43404e-07	S7B_700568702(SPWT)	1	1	0	1	1	0	1	1		1	0	1	1	1	1	1		1	1	1	1	1	1	1	1	1	0	1	1	1	0	1	1	0	1	1	1	1	1	1
2017	Spikelet number	S1B_336787649	1B	336787649	G/A	G	0.42	2.59661e-08	S1B_336787649(SPKLTN)	1	1	0	1	1	0		1	0	1	0	1	1	1	1	1	0	1	0	1		0	1	1	1	1	1	1	1	1	1	1	1	0	1	1	1	1	1	0
2018	Spikelet number	S1B_617281015	1B	617281015	G/A	G	0.72	4.64179e-11	S1B_617281015(SPKLTN)	1	1	0.5	1	1	0.5	1	0.5	0	0.5	1	0.5	1	1	1	1	0.5	0.5	0.5	0.5	1	0.5	0.5	1	0.5	1	1	1	0.5	0.5	0.5	1	0.5	1	0.5	0	1	1	0.5	1
2018	Spikelet number	S3B_372895173	3B	372895173	C/A	C	0.25	3.2948e-07	S3B_372895173(SPKLTN)	0.5	0.5	1	0.5	0.5	0.5	1	1	0.5	1	1	1	0.5	0.5	1	0.5	1	1	1	1	0.5	1	0.5	1	0.5	0.5	1	1	0.5	0.5	0.5	0.5	1	1	0.5	0.5	0.5	1	1	0.5
2018	Spikelet number	S3B_610752596	3B	610752596	C/G	G	0.44	7.98864e-11	S3B_610752596(SPKLTN)	1	0	0	0	0	0	0	0	0	0	0	0	1	1	1	1	0	0	0	0	0	0	0	1	0	1	0	1	1	0	0	0	1	0	0	0	1	1	0	0
2017	Spikelet number	S3B_807353230	3B	807353230	C/T	C	-0.88	2.80188e-08	S3B_807353230(SPKLTN)	1	1	1		1	0	1	1	0.5	1	1	1	1	1		1	1		1	1	1	0.5	0.5	1	1	1	1	1	1	1	1	1	1	1	1		1	1	1	1
2017	Spikelet number	S4D_3725137	4D	3725137	C/T	C	-0.68	2.26302e-08	S4D_3725137(SPKLTN)	1	1	1	1	1	1	0	1	0	1	1	1	1	1	1	1	0	1	1	1	1		1	1	1	1	1	1	1	1	1	1	1	1	1	1	1	1	1	1
2018	Spikelet number	S5A_544738352	5A	544738352	C/T	C	-0.37	3.27333e-09	S5A_544738352(SPKLTN)	0	1	0	1	1	1	1	1	1	1	1	0	1	1		0	1	1	1	1	1	1	0	1	1	1	0	1	0	0	1		0	1	0	1	0	0	0	1
2018	Spikelet number	S6B_41908391	6B	41908391	G/A	A	-0.64	5.1584e-11	S6B_41908391(SPKLTN)	0	0.5	0.5	0.5	0	0.5	0.5	0.5	0.5	0.5	1	0	0	0	0.5	0	0	0	0.5	0.5	0.5	0.5	0	0.5	0.5	0.5	0.5	1	0	0.5	1	0	0.5	0.5	0.5	0	0.5	0.5	1	1
2017	Spikelet number	S6B_689978923	6B	689978923	C/A	C	1.39	5.47043e-07	S6B_689978923(SPKLTN)	1	1	0.5	1	1	1	1	1	1	1	1	1	1	1	1	1	1	1	1	1	1	1	1	1	1	1	1	1	1	1	1	1	1	1	1	1	1	1	1	0.5
2018	Spikelet number	S7A_670904777	7A	670904777	G/C	G	0.38	1.69927e-08	S7A_670904777(SPKLTN)	1	1	1	1	0.5	1	1	1	1	1	1	1	0.5	1	0.5	1	1	1	1	1	1	1	1	0.5		1	0.5	1	1	1	1	1	0.5	1	0.5	0.5	0.5	0.5	1	1
2017	Spikelet number	S7A_85601215	7A	85601215	T/C	C	-0.38	1.13661e-09	S7A_85601215(SPKLTN)	0	0	0	0	0	1	1	1	1	0	0	0	0	0	1	0	1		0	0	0	0	0	1	0	0	0	1	0		1	0	1		0	0	0			0
2017	Spikelet number	S7B_237933969	7B	237933969	T/C	T	0.48	5.41176e-07	S7B_237933969(SPKLTN)	0	1	1	1	1	1	1	0	1	0	1	0	1	1	1	0	1	0	1	1	1	1	1	1	1	1	1	1	1	1	1	1	1	1	0	1	1		1	1
2018	Stem rust	S1A_1236314	1A	1236314	G/T	T	-15.36	1.18588e-11	S1A_1236314(SR)	0	0.5	0	0	0	0	0	0	0	0	0	0	0	0	0.5	0	0	0.5	0	0	0	0	0	0.5	1	1	0.5	0	0	0.5	0	0.5	0.5	0	0	0	0	0.5	0	0
2017	Stem rust	S1B_171106090	1B	171106090	T/C	C	6.87	1.77806e-08	S1B_171106090(SR)	0	0	0	0	0	0	0	0	0	0	0	0		0	1	0	0	1	0.5	0	0	0	0	1	0	0		0	0	1	0	0	1	0	0	0	0	1	0	0
2018	Stem rust	S5A_702172467	5A	702172467	G/A	A	10.64	2.24399e-13	S5A_702172467(SR)	0	0	0	0	0	1	1	0	0	0	0	0	0	0	0	0	0	0	0	0	0	1	1	0	0	0	0	0	0	0	0	0.5	0	0	0	0	1	0	0	0
2018	Stem rust	S7A_477184977	7A	477184977	T/C	T	-10.27	7.37559e-09	S7A_477184977(SR)	1	1	1	1	1	1	1	1	1	1	1	1	1	1	0.5	1	1	0.5	1	1	1	1	1	0.5	1	1	0.5	1	1	0.5	1	1	0.5	1	1	1	1	0.5	1	1
2017	Stem rust	S7D_29550951	7D	29550951	A/G	G	-4.82	6.5856e-07	S7D_29550951(SR)	0	0	0	0	0	0.5	0	0	0	0.5	0	0		0	0	0	0	0	0	0	0	0	0	0	0.5	0.5	0	0.5	0	0	0.5	0.5	0	0	0	0	0	0	0	0
2018	Stem rust AUDPC	S1D_116007310	1D	116007310	G/T	T	-289.94	5.57975e-11	S1D_116007310(SRAU)	0	0	0	0	0	0	0	0	0	0	0	0	0	0	0.5	0	0	0.5	0	0	0	0	0	0.5	0	0	0.5	0	0	0.5	0	0	0.5	0	0	0	0	0.5	0	0
2017	Stem rust AUDPC	S3B_694929945	3B	694929945	G/A	G	-66.03	3.16734e-08	S3B_694929945(SRAU)		1	1		1			0	0	0		1		1	1	1	1	0	1	0	0	1	1	1	0	1	1	0	1	1	1	0	1	1	1		1	1	1	0
2018	Stem rust AUDPC	S5A_471711779	5A	471711779	G/A	A	166.41	6.02474e-07	S5A_471711779(SRAU)	0	0	0		0	1		0	0	0	0	0	0	1	0	0	1	0	0	0	0	0	1	0	0	0	0	1	0	0	0	0	0	0	0	0	0	0		0
2017	Stem rust AUDPC	S7A_668309875	7A	668309875	C/T	T	-228.68	3.50852e-07	S7A_668309875(SRAU)	0	0	0	1	0	1	0	1	1	0	0	0	0	0	0	0	0	0	0	0	0	1	0	0	1	1	0	0	0	0	0	1	0	0	0	0	0	0	0	1
2017	Stem rust AUDPC	S7A_736523425	7A	736523425	G/A	G	-187.77	8.21896e-13	S7A_736523425(SRAU)	1	1	1	1	1	1	1	1	1	1	1	1	1	1	0.5	1	1	0.5	1	1	1	1	1	0.5	1	1	1	1	1	0.5	1	1	0.5	1	1	1	1	0.5	1	1
2017	Stem rust AUDPC	S7D_29550951	7D	29550951	A/G	G	-115.16	4.00196e-09	S7D_29550951(SRAU)	0	0	0	0	0	0.5	0	0	0	0.5	0	0		0	0	0	0	0	0	0	0	0	0	0	0.5	0.5	0	0.5	0	0	0.5	0.5	0	0	0	0	0	0	0	0
2018	Stem rust AUDPC	S7D_29550951	7D	29550951	A/G	G	-191.09	1.72407e-08	S7D_29550951(SRAU)	0	0	0	0	0	0.5	0	0	0	0.5	0	0		0	0	0	0	0	0	0	0	0	0	0	0.5	0.5	0	0.5	0	0	0.5	0.5	0	0	0	0	0	0	0	0
2018	Thousand kernel weight	S3B_6085798	3B	6085798	G/A	A	-1.07	5.31926e-08	S3B_6085798(TKW)	1		0.5	0	0	0	0.5	1	0	0	0	0	1	1	1	1	1	0	1	0		1	1	1	0.5	0.5	0.5	0	0	0	0.5		1	0.5	0.5		1	1	0	0
2018	Thousand kernel weight	S3D_20544367	3D	20544367	G/C	C	-2.33	9.49208e-09	S3D_20544367(TKW)	0	0	0	0	1	0	0	0	0	0	0	0	0	0	0	0	0	0	0	0	0			0	0.5	1	0	0	0	0	0	0	0	0	0	0.5	0	0	0.5	0
2018	Thousand kernel weight	S4A_732725628	4A	732725628	A/C	A	-2.21	1.17715e-08	S4A_732725628(TKW)	1	1	1	1		0	1	1	1	1	1		1	1		1	1	1	1	1	1	1	0	1	1		1		1	1	0	1	1	1	1	1	1		1	1
2017	Thousand kernel weight	S4A_732825683	4A	732825683	G/T	G	-2.22	6.43167e-08	S4A_732825683(TKW)	1	1	1	1		0	1	1	1	1	1		1	1	1	1	1	1	1	1	1	1	0	1	1	1	1	1	1	1	0	1	1	1	1	1	1	1	1	1
2017	Thousand kernel weight	S4B_149938884	4B	149938884	T/C	T	4.07	6.52456e-07	S4B_149938884(TKW)	1	1	1	1	1	1	1	1	1	1	0.5	1	1	1	1	1	1	1	1	1	1	1	1	1	1	1	1	1	1	1	1	1	1	1	1	1	1	1	1	0.5
2017	Thousand kernel weight	S5A_597279906	5A	597279906	G/A	G	4.25	6.31424e-07	S5A_597279906(TKW)	1	1	1		1	1	1	1	1	1	1	1	1	1	1	1	1	1	1	1		1	1	1	1	1	1	1	1	1	1	1	1	1	1	1	1	1	1	0
2017	Thousand kernel weight	S5D_498302498	5D	498302498	G/T	G	-4.37	1.55487e-11	S5D_498302498(TKW)	1	1	0.5	1	1	1	0.5	1	0.5	0.5	1	1	1	1	1	1	0.5	1	1	1	1	1	0.5	1	1	1	1	1	1	1	1	1	1	1	1	1	1	1	1	0.5
2017	Thousand kernel weight	S6A_25317058	6A	25317058	A/T	T	1.56	4.95107e-08	S6A_25317058(TKW)	0.5	0.5	0.5	0.5	0.5	0	0.5	0.5	0.5	0.5	0.5	0.5	0	0.5	0	0.5	0.5	0.5	0.5	0.5	0.5	0.5	0	0.5	0.5	0.5	0.5	0.5	0.5	0.5	0	0.5	0.5	0.5	0.5	0.5	0.5	0	0	0.5
2018	Thousand kernel weight	S6A_26974912	6A	26974912	C/T	C	-1.32	9.24882e-09	S6A_26974912(TKW)	1	1	1	1	1	0	1	1	1	1	1	1	0	1	0	1	0.5	1	1	1	1	1	0	1	1	1	1	1	1	1	0	1	1	1	1	0	1	0	0	1
2017	Thousand kernel weight	S6B_715630919	6B	715630919	A/T	A	-1.26	3.28945e-08	S6B_715630919(TKW)	0	1	0	1	0	1	1	1	1	1	1	0	0	1	0	0	1	1	0	1		1	0.5	0	1	1	0	1	0.5	1	1	1	1	1	1	0.5	0	0	1	1
2017	Total root length	S2D_506778844	2D	506778844	T/G	G	-31.41	1.71558e-10	S2D_506778844(RTLN)	0	0	0	0	0	0	0	0		0	1	0	0	0	0	0	0	0	0	0		0	0	0	0	0	0	1	0	0	0	0	0	0	0	0	0	0	0	1
2017	Total root length	S3B_814148012	3B	814148012	G/A	G	19.81	3.68623e-07	S3B_814148012(RTLN)	1	1	0	1	1		0	1		1	1	1		1	1	1	0	1	1	1	0	0	1	1	1	1	1	0		1	1	1	1	0.5	1		1	1	1	0
2018	Total root length	S5A_584618691	5A	584618691	C/A	A	-12.9	2.91242e-07	S5A_584618691(RTLN)	1	0	0	1	0	0	1	0	0	0	1	0	0	1	0		0	0	0	0	1	0	0	1	0	0	0	1	0	0	0	1	0	1	0		1	0	0	1
2018	Total root length	S6B_6007687	6B	6007687	G/C	G	13.57	2.31593e-07	S6B_6007687(RTLN)	0.5	1	0	1	0.5	1	1	1	0.5	1	1	0.5	0	1	1	0.5	0.5	0.5	0.5	1		0.5	0.5		1	0.5	0.5	1	0.5	0.5	0	1	0.5	1	0	0	0.5	1	0.5	1
2018	Total root length	S6B_6007694	6B	6007694	G/A	G	13.57	2.31593e-07	S6B_6007694(RTLN)	0.5	1	0	1	0.5	1	1	1	0.5	1	1	0.5	0	1	1	0.5	0.5	0.5	0.5	1		0.5	0.5		1	0.5	0.5	1	0.5	0.5	0	1	0.5	1	0	0	0.5	1	0.5	1
2018	Total root length	S7A_710883775	7A	710883775	G/A	A	-16.98	7.99862e-07	S7A_710883775(RTLN)	0	0	0	0	0	0	0	0.5	0	0	0	0.5	0	0	1	0	0	0	0	1	0.5	0	0	1	0.5	0	0	0	0	0	0.5	0	0	0	0	0.5	0	0.5	0	0
2017	Total root length	S7B_744277998	7B	744277998	G/C	C	-106.91	7.52959e-12	S7B_744277998(RTLN)	0	0	0	0		0	0	0	0	0	0	0	0	0	0	0	0	0	0	0	0			0		0	0		0	0	0	0	0	0	0	0	0			1
[truncated: 103 more columns]
